# Supplementary material
Source: publisher figshare collection journal article supplement (https://acs.figshare.com/ndownloader/files/14192030)
Supplement: Supplementary file 1 [file 14192030]

## Supporting information

### Solvent-free Crystallization of Zeolitic Imidazolate Framework Membrane via Layer-by-Layer Deposition

*Pingping Yang,<sup>‡</sup> Zhan Li,<sup>‡</sup> Zhuangzhuang Gao, Mingqiu Song, Jinya Zhou, Qianrong Fang, Ming Xue,\* Shilun Qiu*

<sup>‡</sup>State Key Laboratory of Inorganic Synthesis and Preparative Chemistry, Jilin

University, 2699, Qianjin Street, Changchun, 130012, P. R. China.

Email: xueming@jlu.edu.cn

#### Table of Contents

|                                                                                                                        |    |
|------------------------------------------------------------------------------------------------------------------------|----|
| 1. Schematic diagram of gas separation test device.                                                                    | S2 |
| 2. PXRD of the ZIF-8 powders.                                                                                          | S2 |
| 3. N <sub>2</sub> adsorption isotherm of the ZIF-8 powders.                                                            | S3 |
| 4. PXRD of ZnO film and ZIF-8 membrane.                                                                                | S3 |
| 5. Leica Optic micrographs of the ZnO layer and Hmim layer.                                                            | S4 |
| 6. Long-term stability and recyclability measurement of the ZIF-8 membrane.                                            | S4 |
| 7. Separation performance of ZIF-8 membrane as a function of feed pressure.                                            | S5 |
| 8. The gas separation performance of the ZIF-8 membrane.                                                               | S5 |
| 9. Reproducibility analysis of the ZIF-8 membranes.                                                                    | S5 |
| 10. Comparison of the H <sub>2</sub> /CO <sub>2</sub> separation performance with literature reported ZIF-8 membranes. | S6 |

Total number of pages: 7

Total number of Figures: 7

Total number of Tables: 3

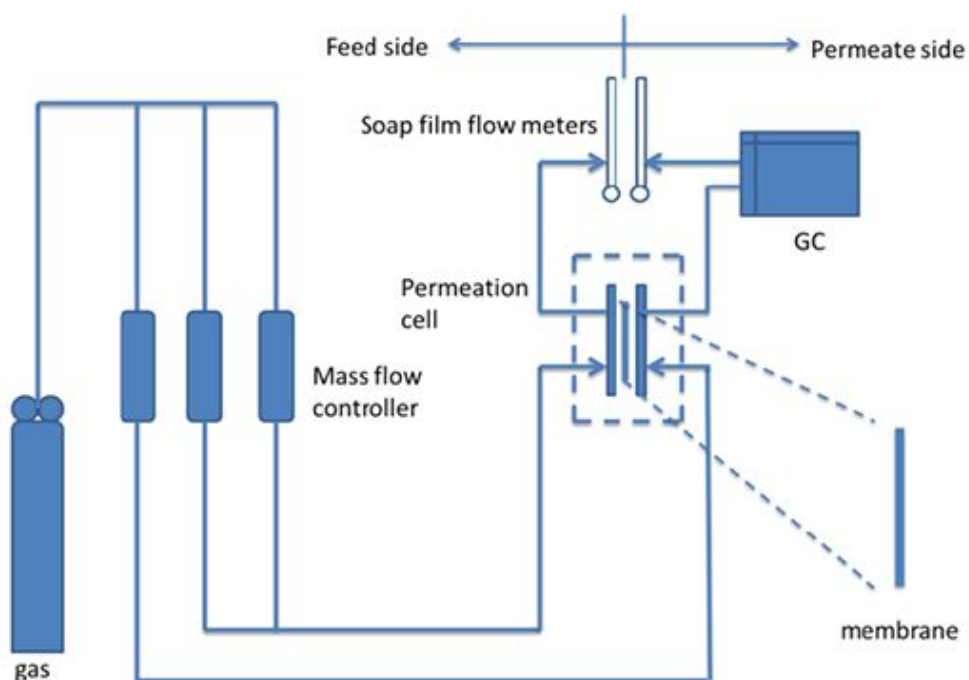

**Figure S1.** Schematic diagram of gas separation test device.

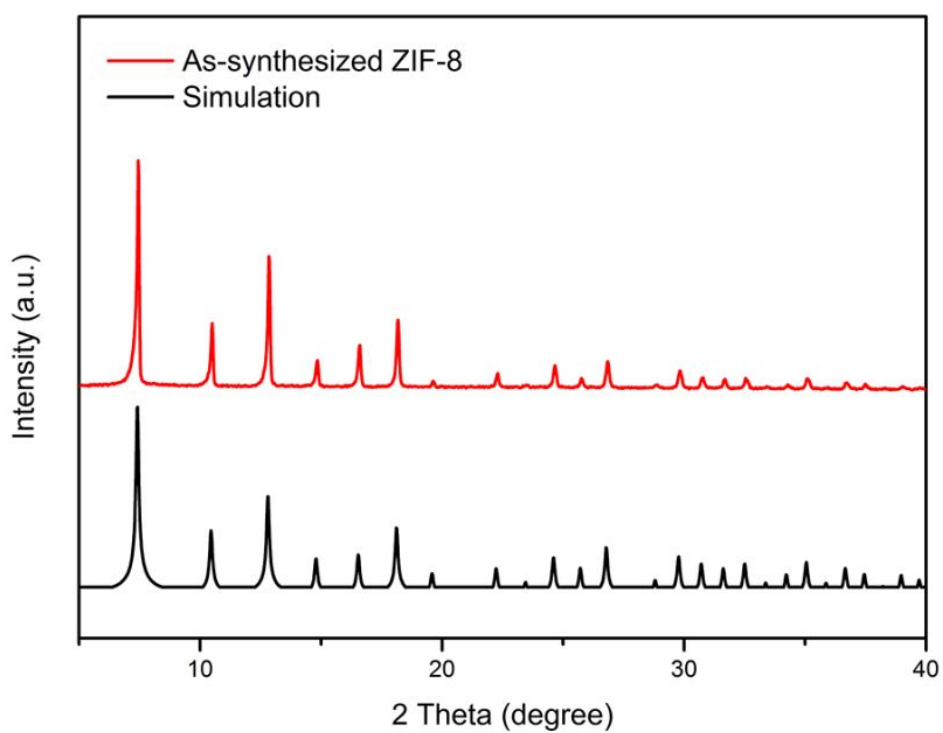

**Figure S2.** PXRD patterns of the simulated ZIF-8 material (black) and the as-synthesized ZIF-8 powder (red).

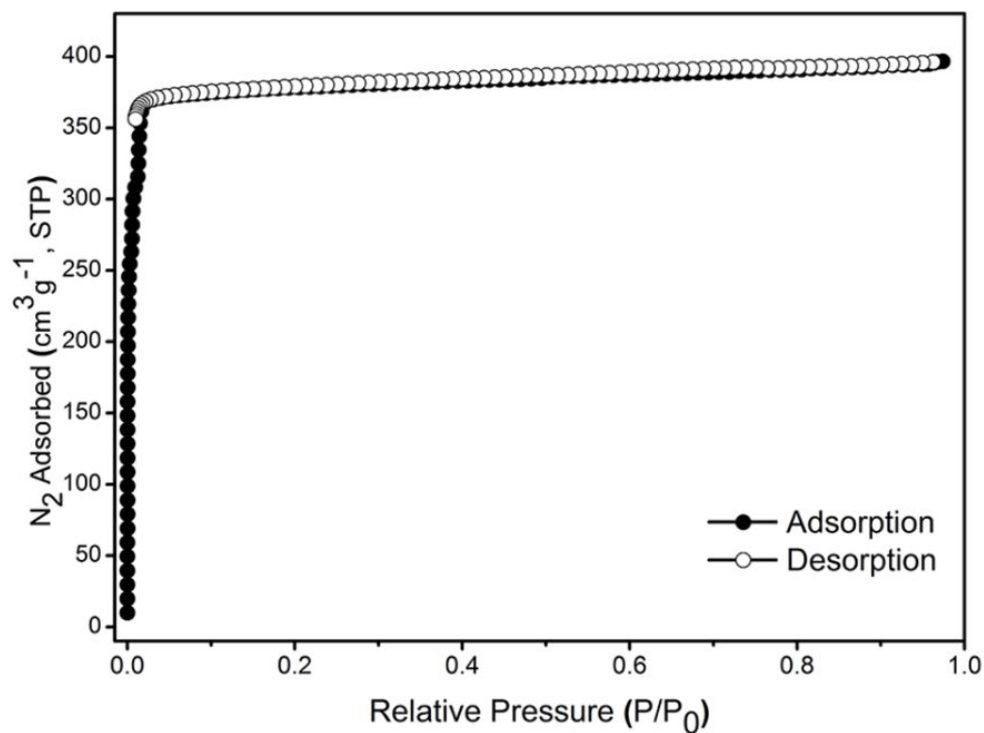

**Figure S3.** Nitrogen adsorption–desorption isotherm of the formed ZIF-8 sample at 77 K.

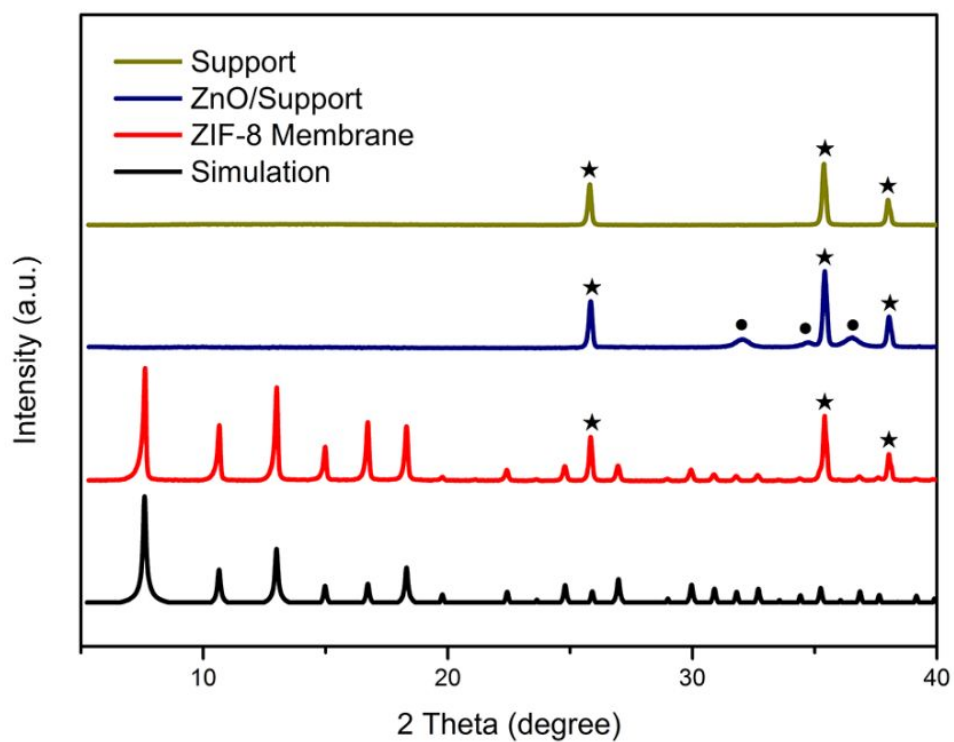

**Figure S4.** PXRD patterns of the bare Al<sub>2</sub>O<sub>3</sub> support (dark yellow), the ZnO-coated Al<sub>2</sub>O<sub>3</sub>

support (blue), the as-synthesized ZIF-8 membrane (red), the simulated ZIF-8 material (black). (★Al<sub>2</sub>O<sub>3</sub> ●ZnO)

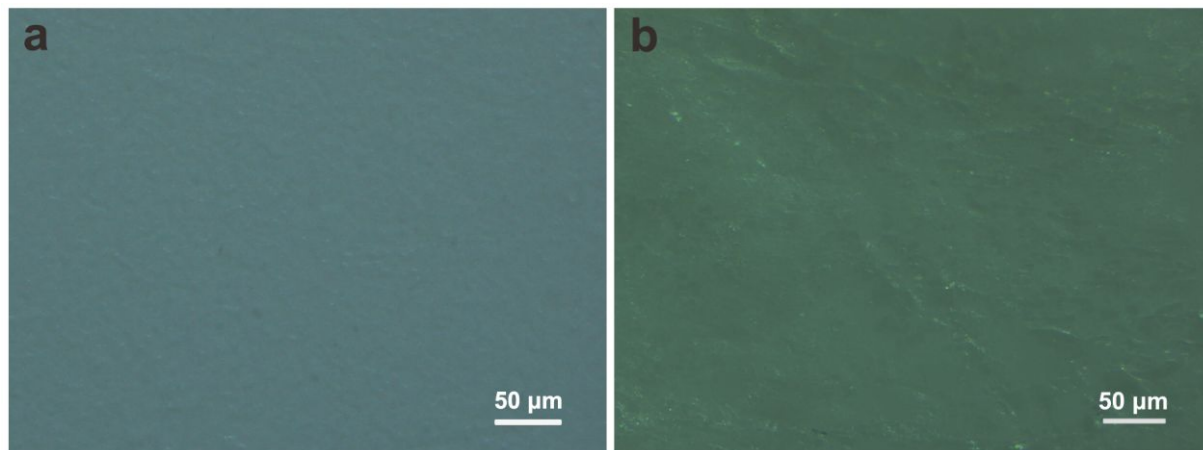

**Figure S5.** Leica Optic micrographs for the ZnO-coated layer (a) and Hmim layer (b) on the Al<sub>2</sub>O<sub>3</sub> support.

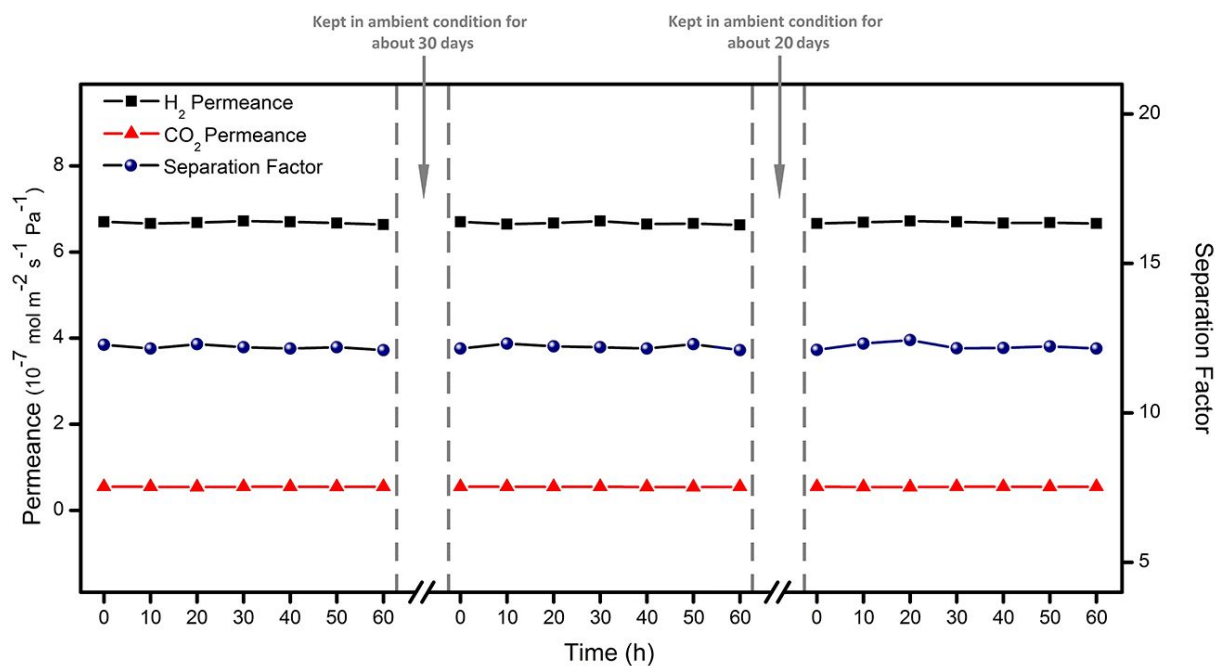

**Figure S6.** Long-term stability and recyclability measurement of the ZIF-8 membrane prepared by solvent-free method. Equimolar H<sub>2</sub>/CO<sub>2</sub> mixture was used as feed gas. Experiment was conducted at 25°C under 1 bar.

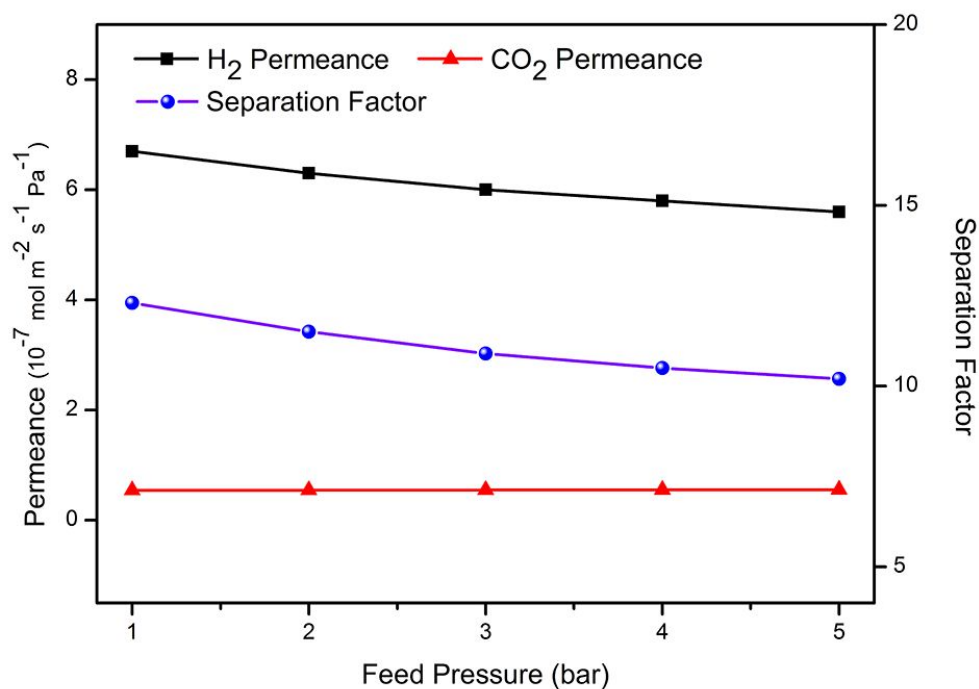

**Figure S7.** Separation performance of as-prepared ZIF-8 membrane as a function of feed pressure at room temperature.

**Table S1.** Mixture gas permeances ( $10^{-7} \text{ mol m}^{-2} \text{ s}^{-1} \text{ Pa}^{-1}$ ) and separation factors ( $\text{H}_2$  versus other gases) of the ZIF-8 membranes at  $25^\circ\text{C}$  and 1 bar.

| Gas(i/j)                        | Permeance(i) | Permeance(j) | Knudsen content | Separation factor |
|---------------------------------|--------------|--------------|-----------------|-------------------|
| H <sub>2</sub> /CO <sub>2</sub> | 6.70         | 0.55         | 4.69            | 12.28             |
| H <sub>2</sub> /N <sub>2</sub>  | 7.10         | 0.95         | 3.74            | 7.48              |
| H <sub>2</sub> /CH <sub>4</sub> | 7.20         | 0.83         | 2.83            | 8.70              |

**Table S2.** Mix gas permeances and separation factors of three ZIF-8 membranes were tested at  $25^\circ\text{C}$  and 1 bar.

| Sample | Permeance (H <sub>2</sub> )<br>( $10^{-7} \text{ mol} \cdot \text{m}^{-2} \cdot \text{s}^{-1} \cdot \text{Pa}^{-1}$ ) | Separation factor<br>(H <sub>2</sub> /CO <sub>2</sub> ) |
|--------|-----------------------------------------------------------------------------------------------------------------------|---------------------------------------------------------|
| M1     | 6.70                                                                                                                  | 12.28                                                   |
| M2     | 6.67                                                                                                                  | 12.24                                                   |
| M3     | 6.75                                                                                                                  | 12.31                                                   |

**Table S3.** Comparison of gas permeation properties ( $H_2$  permeance and  $H_2/CO_2$  selectivity) of ZIF-8 membranes reported previously.

| Support                              | Synthesis Method                                                                                      | Thickness ( $\mu\text{m}$ ) | Permeance ( $H_2$ ) ( $10^{-7}\text{mol}\cdot\text{m}^{-2}\cdot\text{s}^{-1}\cdot\text{Pa}^{-1}$ ) | Selectivity ( $H_2/CO_2$ ) | Refs |
|--------------------------------------|-------------------------------------------------------------------------------------------------------|-----------------------------|----------------------------------------------------------------------------------------------------|----------------------------|------|
| Titania                              | Microwave-Assisted Solvothermal Synthesis                                                             | 30 $\mu\text{m}$            | 0.6                                                                                                | 4.54 <sup>a</sup>          | 19   |
| $\alpha\text{-Al}_2\text{O}_3$       | Liquid phase epitaxy                                                                                  | 1.5 $\mu\text{m}$           | 0.19                                                                                               | 4.63 <sup>a</sup>          | 20   |
| $\text{Al}_2\text{O}_3$ Hollow fiber | Repeated growth                                                                                       | 6 $\mu\text{m}$             | 1.7                                                                                                | 7.1                        | 40   |
| $\gamma\text{-Al}_2\text{O}_3$       | LDH buffer layer modification and solvothermal growth                                                 | 20 $\mu\text{m}$            | 1.4                                                                                                | 4.2                        | 46   |
| $\alpha\text{-Al}_2\text{O}_3$       | Activation of ZnO Nanorods and solvothermal growth                                                    | 6 $\mu\text{m}$             | 1.6                                                                                                | 4.6                        | 47   |
| PAN HF                               | Surface chemical modification and solvothermal growth                                                 | 1 $\mu\text{m}$             | 3.05                                                                                               | 6.85                       | 48   |
| $\gamma\text{-Al}_2\text{O}_3$       | Growth of LDH membrane and then solvothermal treatment                                                | 2 $\mu\text{m}$             | 0.35                                                                                               | 4.2                        | 49   |
| PVDF                                 | Chemical modification of support and solvothermal growth                                              | 30 $\mu\text{m}$            | 19.03                                                                                              | 12.42                      | 50   |
| $\alpha\text{-Al}_2\text{O}_3$ tube  | Activation of ZnO layer and then solvothermal growth                                                  | 8 $\mu\text{m}$             | 2.75                                                                                               | 3.39                       | 51   |
| AAO                                  | Electrophoretic nuclei assembly                                                                       | 0.5 $\mu\text{m}$           | 83                                                                                                 | 7.3 <sup>a</sup>           | 52   |
| PVDF Hollow fiber                    | Hydrothermal sol-gel coating of $\text{TiO}_2$ layer on modified support and then solvothermal growth | 1 $\mu\text{m}$             | 201                                                                                                | 7.04 <sup>a</sup>          | 53   |

|                                        |                                                                         |                   |      |                   |              |
|----------------------------------------|-------------------------------------------------------------------------|-------------------|------|-------------------|--------------|
| BBPO                                   | Simultaneous<br>Surface chemistry<br>and pore structure<br>modification | 0.2 $\mu\text{m}$ | 20.5 | 12.8 <sup>a</sup> | 54           |
| $\alpha\text{-Al}_2\text{O}_3$<br>tube | APTES monolayer<br>modification and<br>cycling precursors               | 2 $\mu\text{m}$   | 4.3  | 3.54 <sup>a</sup> | 55           |
| $\alpha\text{-Al}_2\text{O}_3$         | Surface chemical<br>modification                                        | 12 $\mu\text{m}$  | 1.7  | 3.3 <sup>a</sup>  | 56           |
| $\alpha\text{-Al}_2\text{O}_3$         | Solvent-free<br>crystallization                                         | 7 $\mu\text{m}$   | 6.7  | 12.28             | This<br>work |

---

<sup>a</sup>Ideal separation factor
